# Supplementary material for: Unravelling the Molecular Identification and Antifungal Susceptibility Profiles of Aspergillus spp. Isolated from Chronic Pulmonary Aspergillosis Patients in Jakarta, Indonesia: The Emergence of Cryptic Species
Source: MDPI journal article supplement (doi:10.3390/jof8040411), 2022-04-16
Supplement: s1 [file s1]

**Table S1.** The antifungal susceptibility profiles from the *Fumigati* section.

| Section <i>Fumigati</i>           | Total | Amphotericin |         |              |         |           |         | Itraconazole |         |              |         |           |         | Voriconazole |         |              |         |           |         |
|-----------------------------------|-------|--------------|---------|--------------|---------|-----------|---------|--------------|---------|--------------|---------|-----------|---------|--------------|---------|--------------|---------|-----------|---------|
|                                   |       | Sensitive    |         | Intermediate |         | Resistant |         | Sensitive    |         | Intermediate |         | Resistant |         | Sensitive    |         | Intermediate |         | Resistant |         |
|                                   |       | CPA          | non-CPA | CPA          | non-CPA | CPA       | non-CPA | CPA          | non-CPA | CPA          | non-CPA | CPA       | non-CPA | CPA          | non-CPA | CPA          | non-CPA | CPA       | non-CPA |
| <i>A. fumigatus</i> sensu stricto | 28    | 3            | 1       | 2            | 0       | 10        | 12      | 7            | 12      | 3            | 0       | 5         | 1       | 7            | 3       | 1            | 5       | 7         | 5       |

**Table S2.** The antifungal susceptibility profiles from the *Clavati* section.

| Section <i>Clavati</i>           | Total | Amphotericin |         |              |         |           |         | Itraconazole |         |              |         |           |         | Voriconazole |         |              |         |           |         |
|----------------------------------|-------|--------------|---------|--------------|---------|-----------|---------|--------------|---------|--------------|---------|-----------|---------|--------------|---------|--------------|---------|-----------|---------|
|                                  |       | Sensitive    |         | Intermediate |         | Resistant |         | Sensitive    |         | Intermediate |         | Resistant |         | Sensitive    |         | Intermediate |         | Resistant |         |
|                                  |       | CPA          | non-CPA | CPA          | non-CPA | CPA       | non-CPA | CPA          | non-CPA | CPA          | non-CPA | CPA       | non-CPA | CPA          | non-CPA | CPA          | non-CPA | CPA       | non-CPA |
| <i>A. clavatus</i> sensu stricto | 1     | 1            | 0       | 0            | 0       | 0         | 0       | 1            | 0       | 0            | 0       | 0         | 0       | 0            | 0       | 0            | 0       | 1         | 0       |

**Table S3.** The antifungal susceptibility profiles from the *Flavi* section.

| Section <i>Flavi</i>           | Total | Amphotericin |         |              |         |           |         | Itraconazole |         |              |         |           |         | Voriconazole |         |              |         |           |         |
|--------------------------------|-------|--------------|---------|--------------|---------|-----------|---------|--------------|---------|--------------|---------|-----------|---------|--------------|---------|--------------|---------|-----------|---------|
|                                |       | Sensitive    |         | Intermediate |         | Resistant |         | Sensitive    |         | Intermediate |         | Resistant |         | Sensitive    |         | Intermediate |         | Resistant |         |
|                                |       | CPA          | non-CPA | CPA          | non-CPA | CPA       | non-CPA | CPA          | non-CPA | CPA          | non-CPA | CPA       | non-CPA | CPA          | non-CPA | CPA          | non-CPA | CPA       | non-CPA |
| <i>A. flavus</i> sensu stricto | 7     | 0            | 0       | 0            | 0       | 2         | 5       | 2            | 5       | 0            | 0       | 0         | 0       | 1            | 3       | 1            | 1       | 0         | 1       |
| <i>A. tamarii</i>              | 1     | 0            | 0       | 0            | 0       | 0         | 1       | 0            | 1       | 0            | 0       | 0         | 0       | 0            | 0       | 0            | 1       | 0         | 0       |

**Table S4.** The antifungal susceptibility profiles from the *Nigri* section.

| Section <i>Nigri</i>          | Total | Amphotericin |         |              |         |           |         | Itraconazole |         |              |         |           |         | Voriconazole |         |              |         |           |         |
|-------------------------------|-------|--------------|---------|--------------|---------|-----------|---------|--------------|---------|--------------|---------|-----------|---------|--------------|---------|--------------|---------|-----------|---------|
|                               |       | Sensitive    |         | Intermediate |         | Resistant |         | Sensitive    |         | Intermediate |         | Resistant |         | Sensitive    |         | Intermediate |         | Resistant |         |
|                               |       | CPA          | non-CPA | CPA          | non-CPA | CPA       | non-CPA | CPA          | non-CPA | CPA          | non-CPA | CPA       | non-CPA | CPA          | non-CPA | CPA          | non-CPA | CPA       | non-CPA |
| <i>A. niger</i> sensu stricto | 7     | 1            | 0       | 1            | 0       | 2         | 3       | 3            | 2       | 0            | 0       | 1         | 1       | 3            | 2       | 1            | 0       | 0         | 1       |
| <i>A. welwitschiae</i>        | 1     | 0            | 1       | 0            | 0       | 0         | 0       | 0            | 1       | 0            | 0       | 0         | 0       | 0            | 0       | 0            | 0       | 0         | 1       |
| <i>A. tubingensis</i>         | 3     | 0            | 1       | 0            | 0       | 1         | 1       | 1            | 1       | 0            | 0       | 0         | 1       | 1            | 1       | 0            | 1       | 0         | 0       |
| <i>A. aculeatus</i>           | 2     | 0            | 0       | 1            | 0       | 1         | 0       | 2            | 0       | 0            | 0       | 0         | 0       | 2            | 0       | 0            | 0       | 0         | 0       |
| <i>A. brunneoviolaceus</i>    | 7     | 1            | 2       | 1            | 2       | 0         | 1       | 2            | 5       | 0            | 0       | 0         | 0       | 2            | 5       | 0            | 0       | 0         | 0       |
| <i>A. neoniger</i>            | 2     | 0            | 0       | 1            | 0       | 1         | 0       | 1            | 0       | 1            | 0       | 0         | 0       | 1            | 0       | 1            | 0       | 0         | 0       |

Cryptic  
(n = 15)
